# Supplementary material for: A systematic review and meta-analysis of the direct epidemiological and economic effects of seasonal influenza vaccination on healthcare workers
Source: PLOS journal article supplement (doi:10.1371/journal.pone.0198685), 2018-06-07

**S5 Fig. The sensitivity analysis for the mean days of absenteeism after removing studies with low quality.**

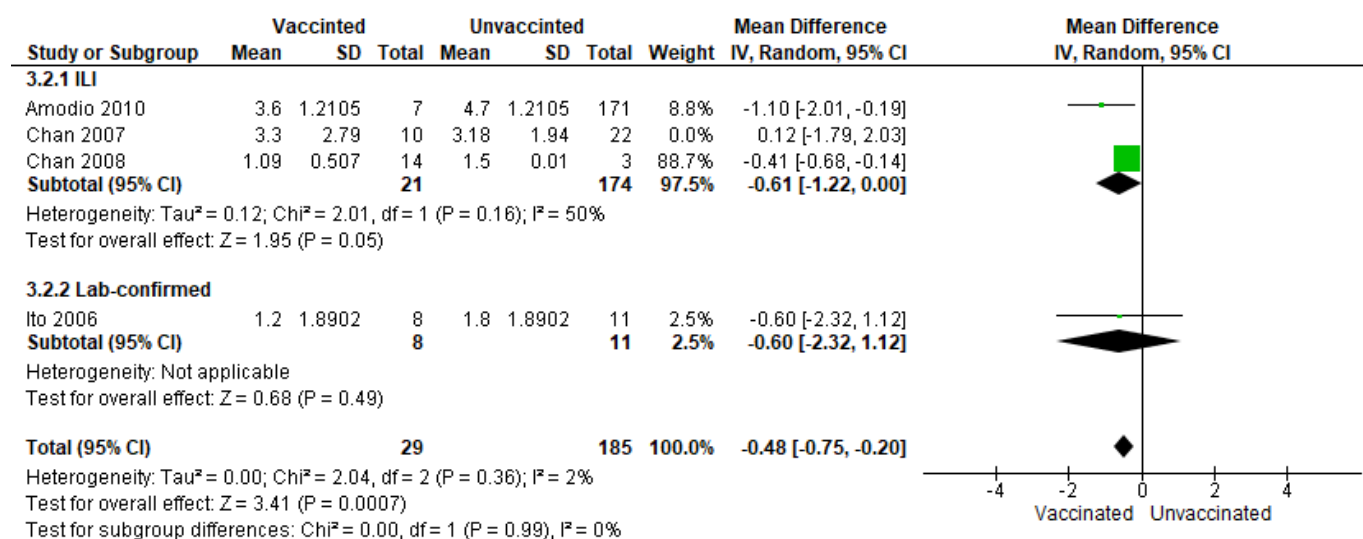

Supplement: S11 (10.1371/journal.pone.0198685.s011) [file journal.pone.0198685.s011]
